# Supplementary material for: Bimetallic metal organic framework/Ni doped ZnO nanomaterials modified carbon paste electrode for selective electrochemical determination of ciprofloxacin
Source: Royal Society of Chemistry journal article supplement (doi:10.1039/d3ra08174e), 2024-01-01

## Bimetallic metal organic framework/Ni doped ZnO nanomaterials modified carbon paste electrode for selective electrochemical determination of ciprofloxacin

Susan Sadeghi<sup>1\*</sup>, Javad Javanshiri-Ghasemabadi<sup>1</sup>

<sup>1</sup>Department of Chemistry, University of Birjand, P.O. Box 97175-615, Birjand, Iran

\*Corresponding author: e-mail: ssadeghi@birjand.ac.ir (S. Sadeghi)

**Fig. S1** Cyclic voltammograms of 5.0 mmol L<sup>-1</sup> [Fe(CN)<sub>6</sub>]<sup>3-/4-</sup> solution containing 0.10 mol L<sup>-1</sup> KCl at the (a) bare CPE, (b) NZP/CPE, (c) Cu/Ce-MOF/CPE, and (d) Cu/Ce-MOF/NZP/CPE

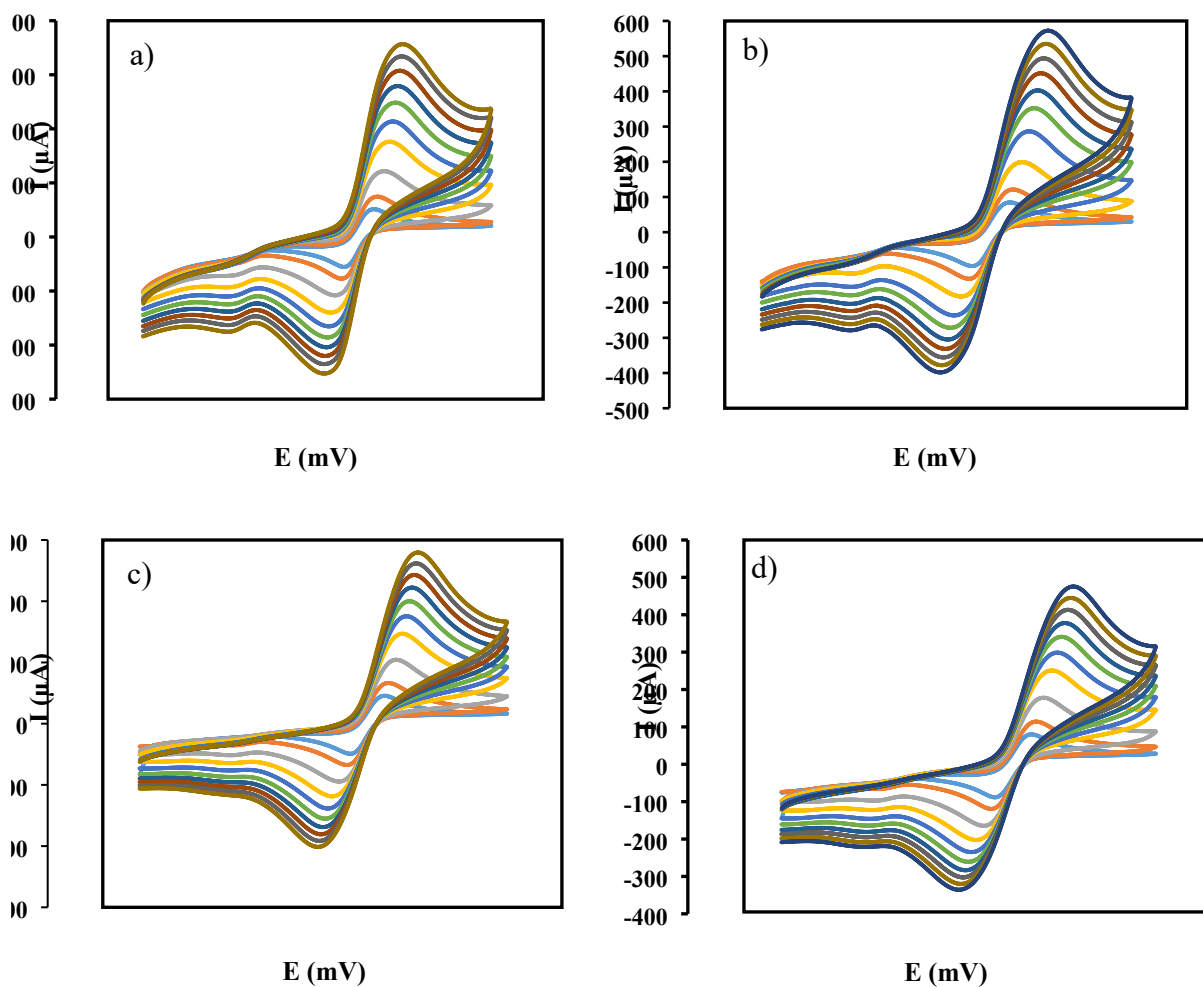

**Fig. S2. (A)** LSV of CIP in 0.1 mol L<sup>-1</sup> phosphate buffer (pH=3) at a scan rate 20 mV s<sup>-1</sup> . Inset shows Tafel plot as potential (mV) vs logarithm of current (μA) for the rising part of LSV peak current.

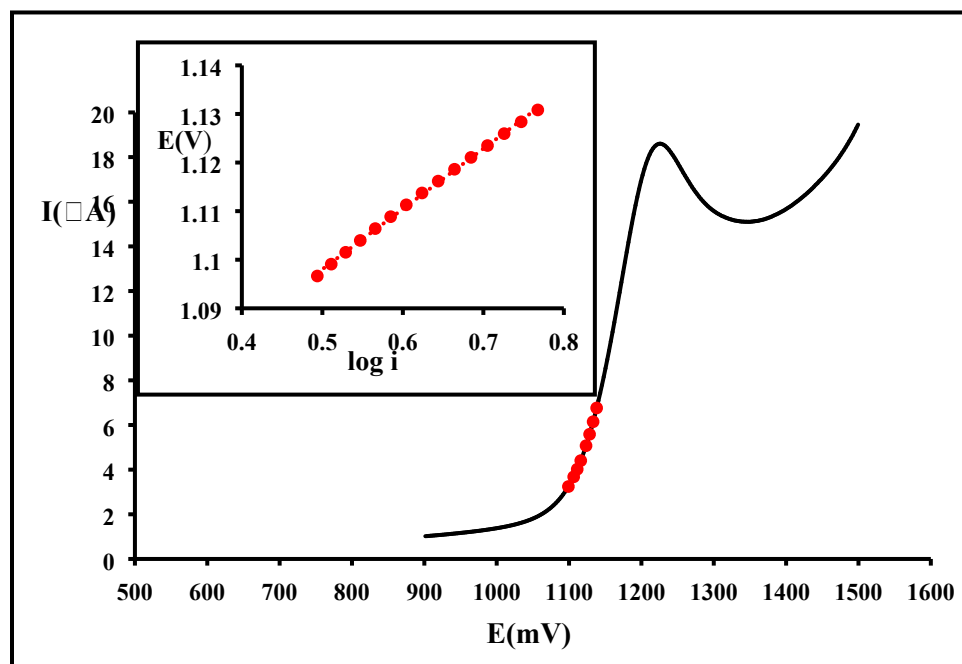

**Fig. S3** Schematic of probable mechanism of electrooxidation of CIP on Cu/Ce-MOF/NZP/CPE

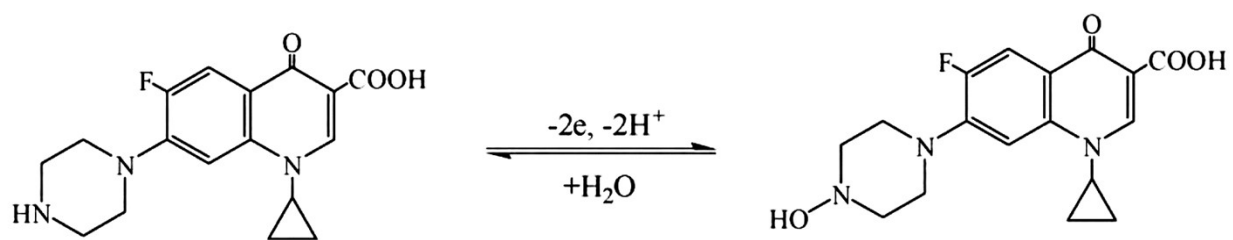

Supplement: d3ra08174e1.pdf [file d3ra08174e1.pdf]
